# Supplementary material
Source: Research Square preprint supplement (doi:10.21203/rs.3.rs-8775786/v1)
Supplement: Supplementary file 1 [file 9c8117cda60f0d7dddf4e357.docx]

**DATA EXTRACTION FORM (DEF)**

**Study Title: Risk Factors and Adverse Pregnancy Related Outcomes among Women with Gestational Diabetes Mellitus in Urban and Rural Health Facilities: A Retrospective Cohort Study in Central Uganda.**

Study Identification Number**…………………………**

Age**…………………**Sex**…………………**

Facility**………………………….**

**I) LOCATION**

1). Urban ……………2. Rural…………………

**II). Level of education level**

1. No formal education 2. Primary 3. O-Level 4. A-level 5. Tertiary

**III) Occupation**

1. Farmer 2. Business 3. Teacher 4. House wise 5. None 6. Other

**IV) Marital status**

1. Single 2. Married 3. Separated 4. Divorced

**V) Are you diabetic?**

1. Yes 2.NO 3.I don’t know

**VI) Parity**

(1).1-5 (2) >5

**VII) Gestational Diabetes Risk factors**

| **Risk factor** | **1.Yes** | **2.No** |
| --- | --- | --- |
| Age >35 |  |  |
| Parity (More than Para 5) |  |  |
| Overweight/obesity (BMI > 30 Kg/m2) |  |  |
| Short stature (<150cm) |  |  |
| History of diabetes mellitus in first degree relatives (mother, father, sister, brother) |  |  |
| Alcohol ingestion |  |  |
| Smoking |  |  |
| Hypertension |  |  |
| Past history of poor pregnancy outcome (abortion, foetal loss), |  |  |
| History of delivering baby > 4kg in past |  |  |
| Gestational Diabetes in a previous pregnancy |  |  |
| History of Pre-eclampsia (pregnancy induced hypertension) |  |  |
| Multiple (twin) pregnancy |  |  |

**VIII) Weight……………. Height…………………. Body Mass Index……………….**

**IX) Blood pressure……………………………………**

**X) Fasting blood glucose <24 weeks of Amenorrhea (WOA)-------------------------**

**X1) Oral Glucose Tolerance Test (OGTT) at 24-28 WOA**

Fasting blood glucose-------------------

1 hour post OGTT---------------------

2-hour post OGTT-------------------

**X11) Gestational Diabetes**

1. Yes 2. No

**X111) OGTT at 32 WOA**

Fasting blood glucose-------------------

1 hour post OGTT---------------------

2-hour post OGTT-------------------

**X1V) Gestational Diabetes**

1. Yes 2. No

**XV) Gestational Diabetes was managed with:**

1. Life style alone
2. Life style and Oral Medications (Metformin)
3. Life style and Insulin

**XVI) Pregnancy Related Outcomes**

**1. Maternal outcomes**

| **Outcome** | **Yes** | **No** |
| --- | --- | --- |
| Pre-eclampsia |  |  |
| Eclampsia |  |  |
| Oligohydramnios |  |  |
| Polyhydramnios |  |  |

**2. Intrapartum outcomes**

| **Outcome** | **Yes** | **No** |
| --- | --- | --- |
| Premature rupture of membranes |  |  |
| Spontaneous vaginal delivery |  |  |
| Emergency Caesarean Section |  |  |
| Pre term delivery |  |  |

**3. Perinatal outcomes**

| **Outcome** | **Yes** | **No** |
| --- | --- | --- |
| Foetal death |  |  |
| Macrosomia (Birth weight > 4Kg) |  |  |
| Intra uterine growth restriction |  |  |
| Apgar Score at 1 min < 7 |  |  |
| Apgar score at 5min< 7 |  |  |
| Congenital malformations |  |  |

**4. Neonatal outcomes**

| **Outcome** | **Yes** | **No** |
| --- | --- | --- |
| NICU/Nursery admission |  |  |
| Neonatal hypoglycaemia |  |  |
| Neonatal hyperbilirubinemia |  |  |
| Neonatal respiratory distress |  |  |

**XVII) Post-delivery follow up for GDM women (6 weeks after delivery)**

**OGTT for no-pregnant**

Fasting blood glucose------------------

2-hour post OGTT-------------------

Glycated hemoglobin………….
